# Supplementary material for: Emergent heterogeneity in putative mesenchymal stem cell colonies: Single-cell time lapsed analysis
Source: PubMed Central journal article supplement (PMC6447157; doi:10.1371/journal.pone.0213452), 2019-04-03

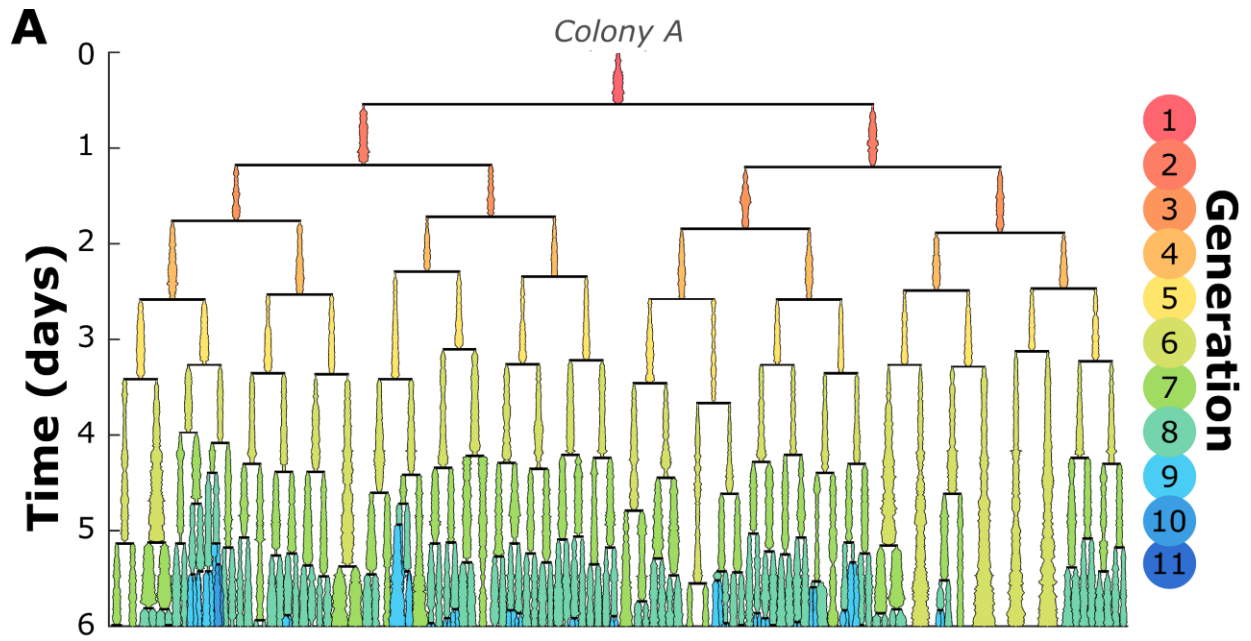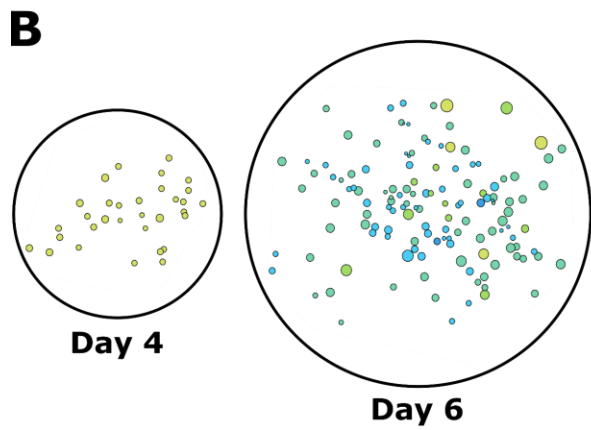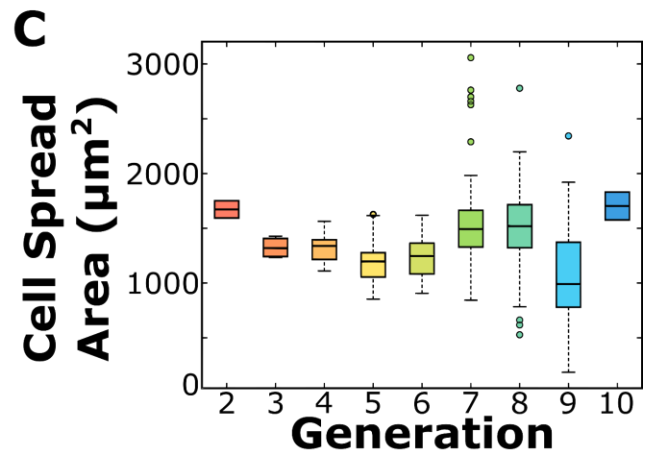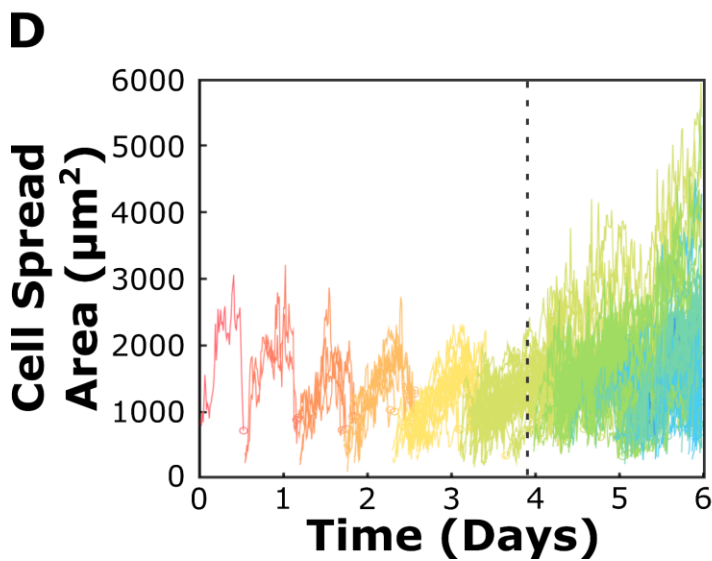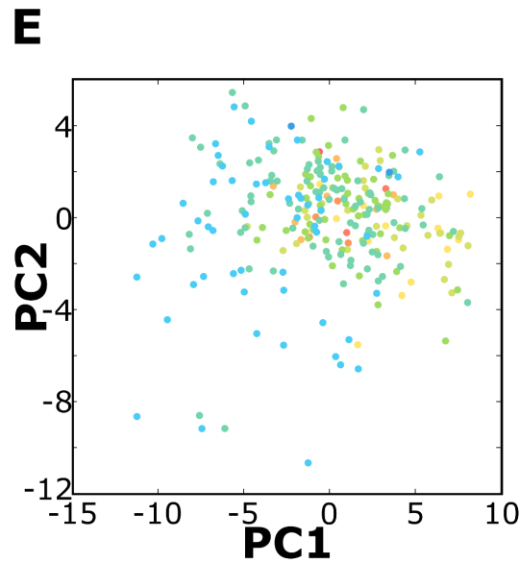

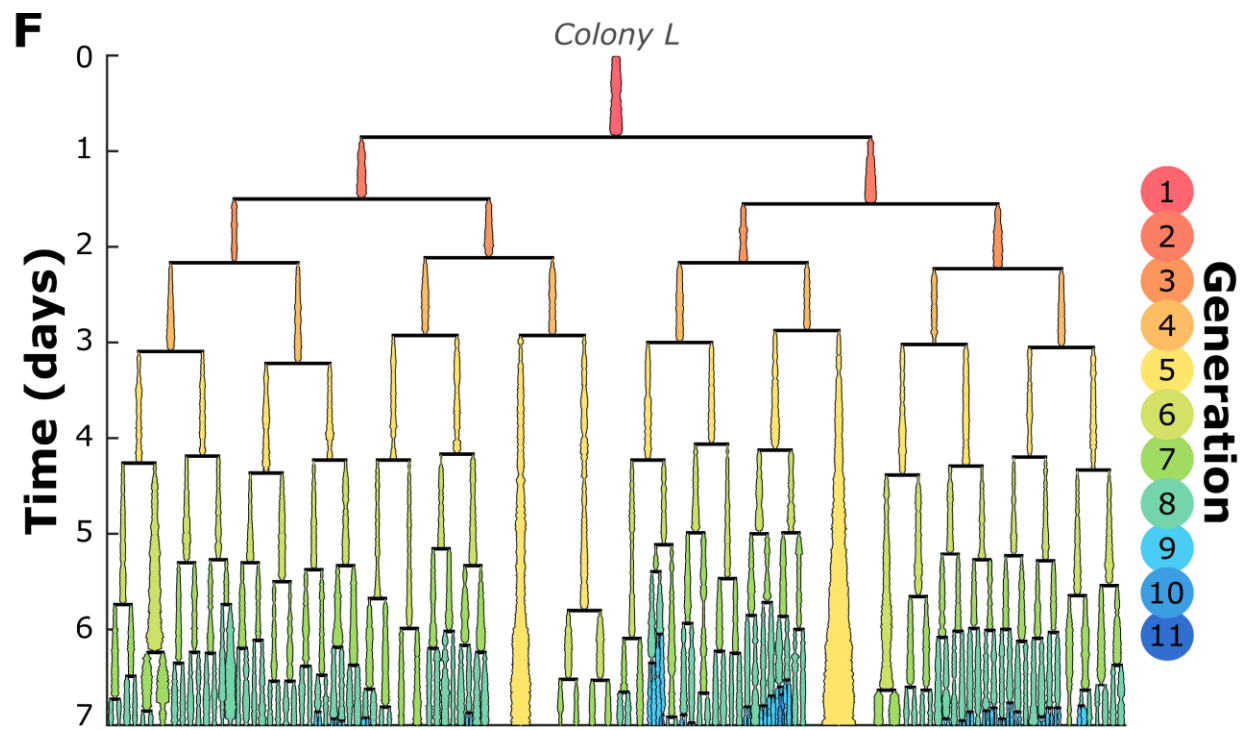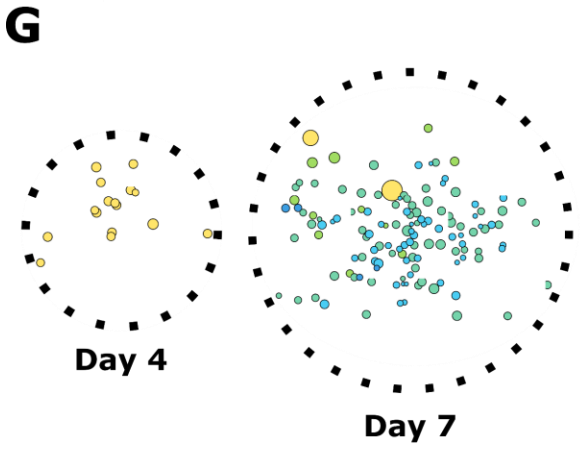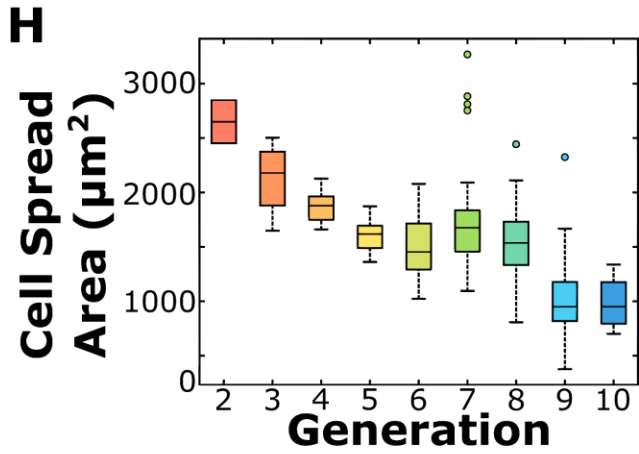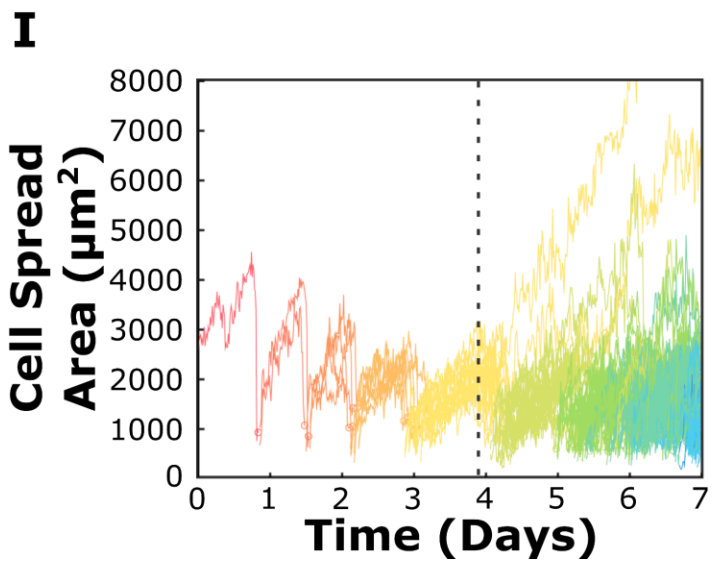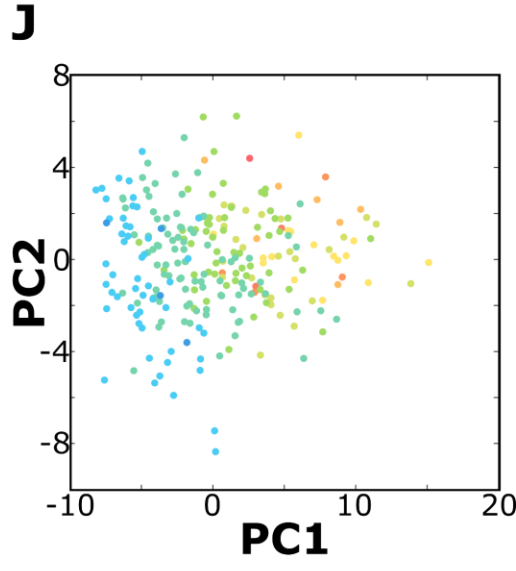

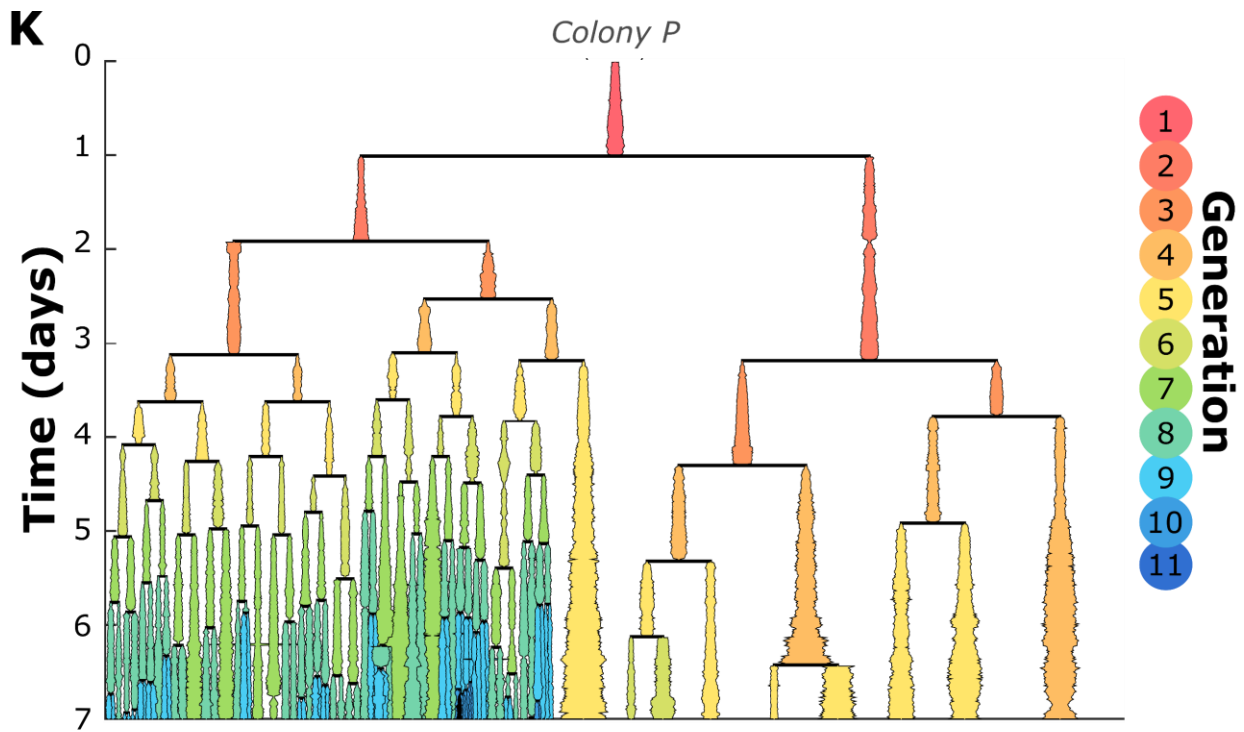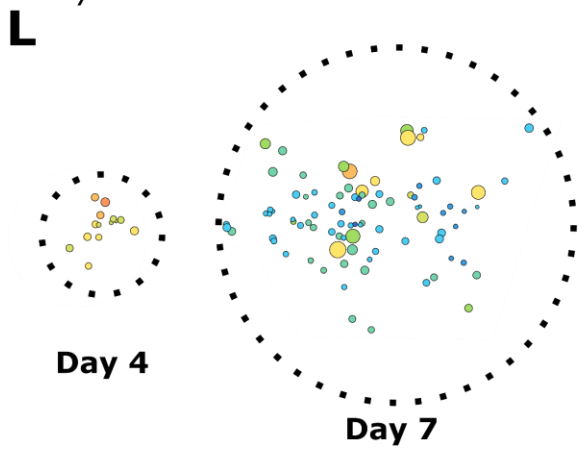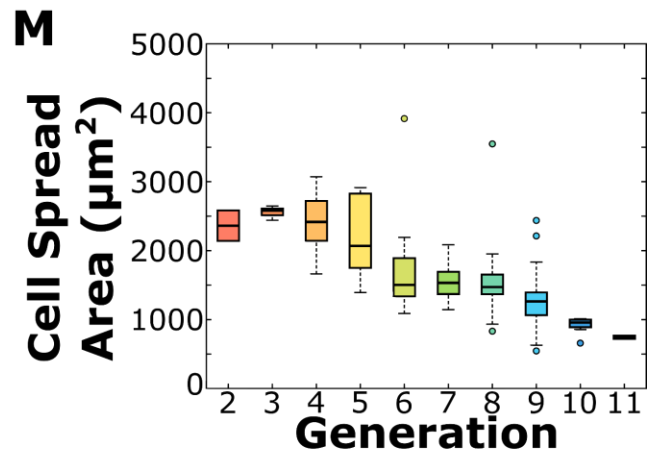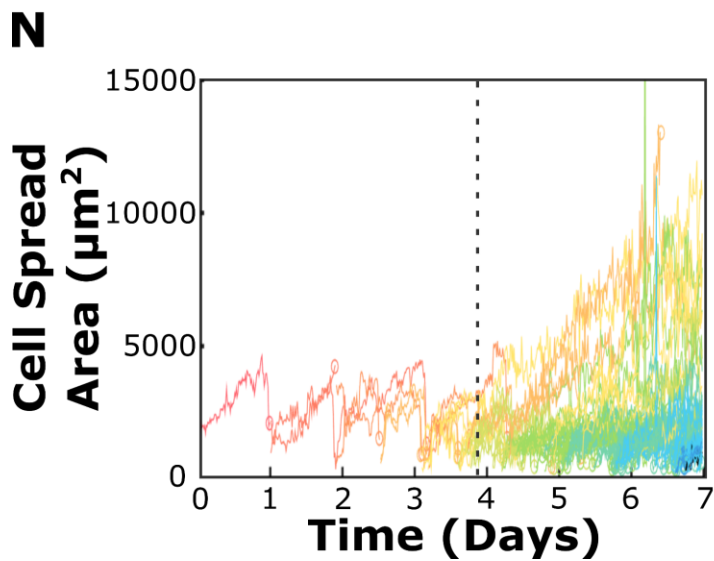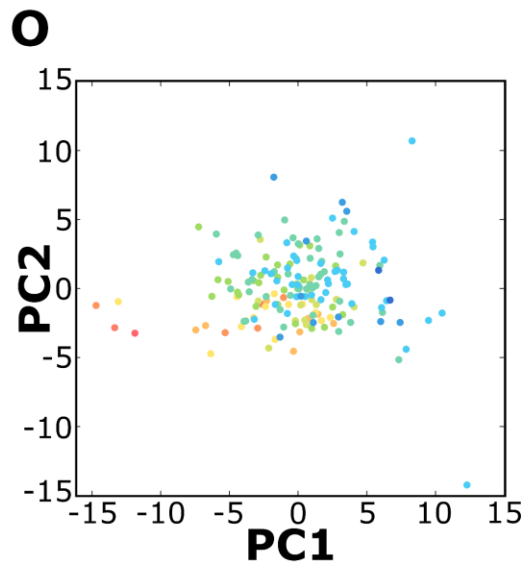

Supplement: pone.0213452.s007.pdf [file pone.0213452.s007.pdf]
